# Supplementary material
Source: publisher site journal article supplement (https://www.dovepress.com/get_supplementary_file.php?f=493542.docx)

**Supplementary file**

**Supplementary table 1: Frequency and percentages of participant’s responses to knowledge questions:**

| **Questions** | **Questions about the prescribed drug** | **Correct response**  **n (%)** | **Incorrect response**  **n (%)** | **Didn’t know**  **n (%)** |
| --- | --- | --- | --- | --- |
| 2. What is the name of the prescribed medication? | Name | 45 (11.7) | 2 (0.5) | 338 (87.8) |
| 3.What did the doctor prescribe this medication for? | Therapeutic indication | 191 (49.6) | 65 (16.9) | 129 (33.5) |
| 4.What is the dosage of medication that you should take? | Dosage | 350 (90.9) | 4 (1.0) | 31 (8.1) |
| 5.How often should you take the medication? | Time of administration | 356 (92.5) | 3 (0.8) | 26 (6.8) |
| 6.How long should you take the prescribed medication for? | Duration of treatment | 296 (76.9) | 2 (0.5) | 87 (22.6) |
| 7.How should you use the prescribed medication? | Form of use | 352 (91.4) | 5 (1.3) | 28 (7.3) |
| 8.What should you do if you miss one or more doses? | Attitude when one or more dosages are missed | 99 (25.7) | 13 (3.4) | 273 (70.9) |
| 9. Are there any other medications, foods, or drinks you should avoid while using this medication | Interactions with other drugs and/or foods | 44 (11.4) | 22 (5.7) | 319 (82.9) |
| 10.Can this medication cause side effects? | Adverse effects | 28 (7.3) | 21 (5.5) | 336 (87.3) |
|  |  |  |  |  |
| **Additional Information from questions** | **Yes** | **No** |  |  |
| 1. Is it your first time taking this medication | 233 (60.5) | 152 (39.5) |  |  |
| 11. Have you ever experienced these side effects? | 35 (9.1) | 350 (90.9) |  |  |
| 12. Do you need more information on how to take your medication | 345 (89.6) | 40 (10.4) |  |  |

**Supplementary figure 1: Survey Questionnaire to assess patient’s knowledge regarding their prescribed gabapentinoid:**
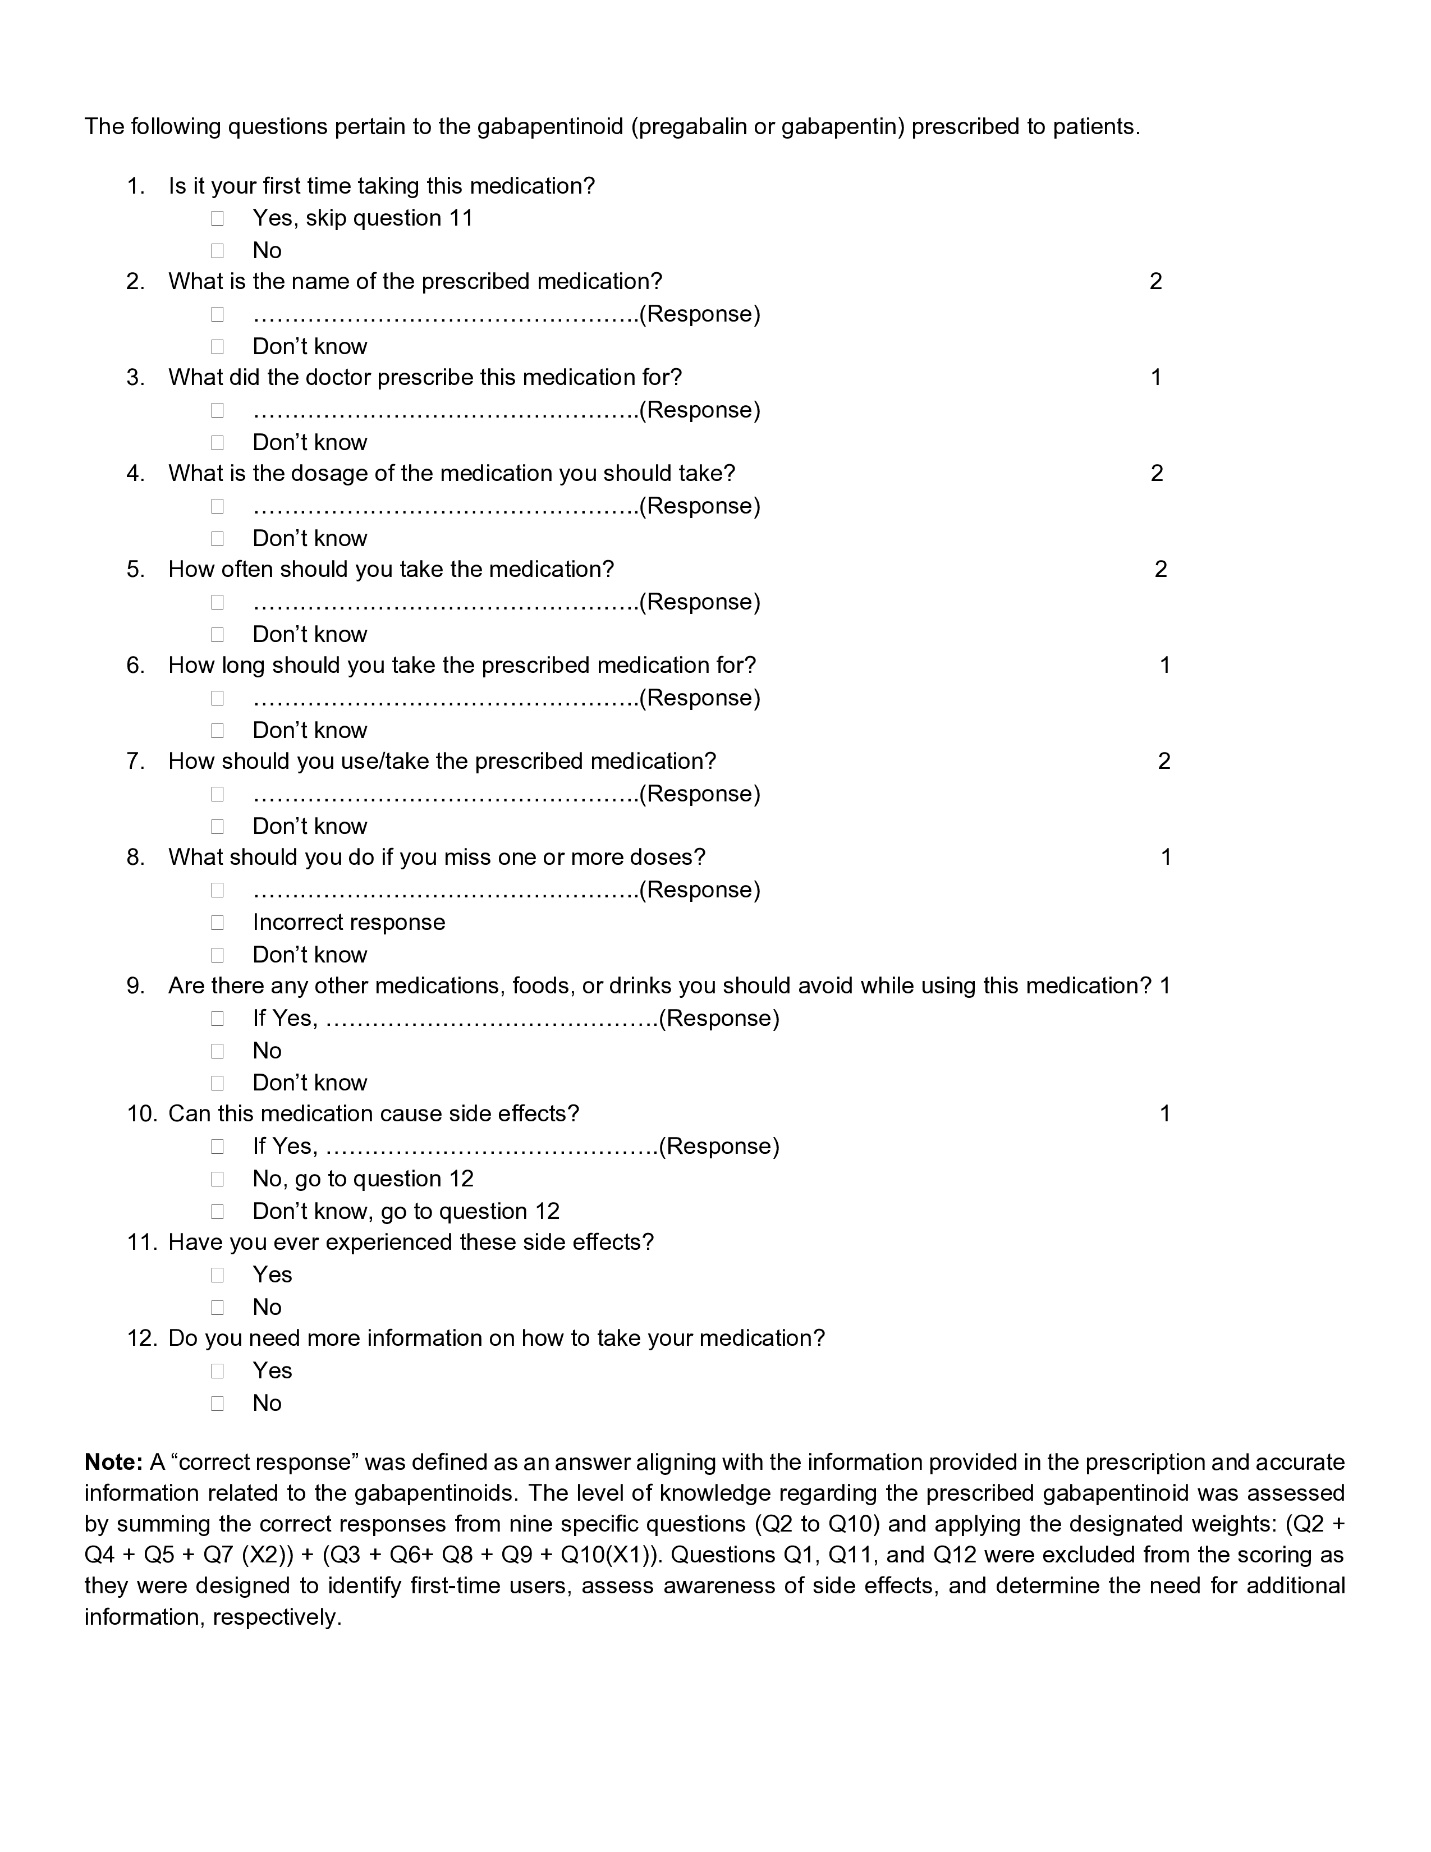

Supplement: Supplementary file 1 [file get_supplementary_file.php]
